# Supplementary material for: The experiences and needs of couples affected by prostate cancer aged 65 and under: a qualitative study
Source: Springer Nature journal article supplement (doi:10.1007/s11764-020-00936-1), 2020-09-24
Supplement: MOESM1 [file 18409262]

**Online Resource 1- Consolidated criteria for reporting qualitative studies (COREQ)**

The experiences and needs of couples affected by prostate cancer aged 65 and under; a qualitative study.

Journal of Cancer Survivorship

Nicole Collaço<sup>1,2\*</sup>, Richard Wagland<sup>1</sup>, Obrey Alexis<sup>2</sup>, Anna Gavin<sup>3</sup>, Adam Glaser<sup>4</sup>, Eila K  
Watson<sup>2</sup>

<sup>1</sup> Faculty of Health Sciences, University of Southampton, S017 1BJ

<sup>2</sup> Faculty of Health and Life Sciences, Oxford Brookes University, Jack Straws Lane, Oxford,  
OX3 0FL

<sup>3</sup> Northern Ireland Cancer Registry Centre for Public Health, School of Medicine, Dentistry and  
Biomedical Sciences, Queen's University, Belfast, BT12 6BA

<sup>4</sup> Leeds Institute of Cancer and Pathology, Faculty of Medicine and Health, University of Leeds,  
Worsley Building, Leeds, LS2 9NL

\*Correspondence to:

Nicole Collaço<sup>1</sup>

University of Southampton

Email: n.b.collaco@soton.ac.uk

**Manuscript:** The experiences and needs of couples affected by prostate cancer aged 65 and under; a qualitative study.

## Consolidated criteria for reporting qualitative studies (COREQ): 32-item checklist

Developed from:

Tong A, Sainsbury P, Craig J. Consolidated criteria for reporting qualitative research (COREQ): a 32-item checklist for interviews and focus groups. *International Journal for Quality in Health Care*. 2007. Volume 19, Number 6: pp. 349 – 357

| No. Item                                       | Guide questions/description                                                                                                               | Reported on Page #                                                                                                  |
|------------------------------------------------|-------------------------------------------------------------------------------------------------------------------------------------------|---------------------------------------------------------------------------------------------------------------------|
| <b>Domain 1: Research team and reflexivity</b> |                                                                                                                                           |                                                                                                                     |
| <i>Personal Characteristics</i>                |                                                                                                                                           |                                                                                                                     |
| 1. Interviewer/facilitator                     | Which author/s conducted the interview or focus group?                                                                                    | Nicole Collaco, Page 5                                                                                              |
| 2. Credentials                                 | What were the researcher's credentials?<br>E.g. PhD, MD                                                                                   | PhD<br>(Not required to be stated by journal)                                                                       |
| 3. Occupation                                  | What was their occupation at the time of the study?                                                                                       | PhD Student<br>Page 5                                                                                               |
| 4. Gender                                      | Was the researcher male or female?                                                                                                        | Female.<br>Page 5                                                                                                   |
| 5. Experience and training                     | What experience or training did the researcher have?                                                                                      | Page 5                                                                                                              |
| <i>Relationship with participants</i>          |                                                                                                                                           |                                                                                                                     |
| 6. Relationship established                    | Was a relationship established prior to study commencement?                                                                               | No<br>Page 5                                                                                                        |
| 7. Participant knowledge of the interviewer    | What did the participants know about the researcher? e.g. personal goals, reasons for doing the research                                  | Participant information sheet and consent form<br>Methods<br>Page 5 under<br><i>Recruitment and Data Collection</i> |
| 8. Interviewer characteristics                 | What characteristics were reported about the interviewer/facilitator? e.g. Bias, assumptions, reasons and interests in the research topic | Reported on page 4-5 under <i>Recruitment and Data Collection</i> .                                                 |

|                                          |                                                                                                                                                          |                                                                |
|------------------------------------------|----------------------------------------------------------------------------------------------------------------------------------------------------------|----------------------------------------------------------------|
| <b>Domain 2: study design</b>            |                                                                                                                                                          |                                                                |
| <i>Theoretical framework</i>             |                                                                                                                                                          |                                                                |
| 9. Methodological orientation and Theory | What methodological orientation was stated to underpin the study? e.g. grounded theory, discourse analysis, ethnography, phenomenology, content analysis | Methods- Data analysis<br>Page 5                               |
| <i>Participant selection</i>             |                                                                                                                                                          |                                                                |
| 10. Sampling                             | How were participants selected? e.g. purposive, convenience, consecutive, snowball                                                                       | Methods under <i>Recruitment and Data Collection</i><br>Page 4 |
| 11. Method of approach                   | How were participants approached? e.g. face-to-face, telephone, mail, email                                                                              | Methods<br>Page 5 under <i>Interview Procedures</i>            |
| 12. Sample size                          | How many participants were in the study?                                                                                                                 | Results<br>Page 6                                              |
| 13. Non-participation                    | How many people refused to participate or dropped out? Reasons?                                                                                          | Results- <i>study sample</i><br>Page 6                         |
| <i>Setting</i>                           |                                                                                                                                                          |                                                                |
| 14. Setting of data collection           | Where was the data collected? e.g. home, clinic, workplace                                                                                               | Page 5 under <i>Interview procedures</i>                       |
| 15. Presence of non-participants         | Was anyone else present besides the participants and researchers?                                                                                        | No.<br>Page 5 under <i>Interview procedures</i>                |
| 16. Description of sample                | What are the important characteristics of the sample? e.g. demographic data, date                                                                        | Table 1. (see online resource 3).<br>Referred to on page 6     |
| <i>Data collection</i>                   |                                                                                                                                                          |                                                                |
| 17. Interview guide                      | Were questions, prompts, guides provided by the authors? Was it pilot tested?                                                                            | Methods, under <i>interview procedures</i><br>Page 5           |
| 18. Repeat interviews                    | Were repeat inter views carried out? If yes, how many?                                                                                                   | No.<br>Page 5 under <i>Interview procedures</i>                |
| 19. Audio/visual recording               | Did the research use audio or visual recording to collect the data?                                                                                      | Methods<br>Page 4                                              |

|                                        |                                                                                                                                 |                                                              |
|----------------------------------------|---------------------------------------------------------------------------------------------------------------------------------|--------------------------------------------------------------|
| 20. Field notes                        | Were field notes made during and/or after the inter view or focus group?                                                        | Analysis<br>Page 5                                           |
| 21. Duration                           | What was the duration of the inter views or focus group?                                                                        | Page 5 under<br><i>Interview procedures</i>                  |
| 22. Data saturation                    | Was data saturation discussed?                                                                                                  | Analysis<br>Page 5                                           |
| 23. Transcripts returned               | Were transcripts returned to participants for comment and/or correction?                                                        | No.<br>Page 5 under<br><i>Interview procedures</i>           |
| <b>Domain 3: analysis and findings</b> |                                                                                                                                 |                                                              |
| <i>Data analysis</i>                   |                                                                                                                                 |                                                              |
| 24. Number of data coders              | How many data coders coded the data?                                                                                            | Four (NC, EW, RW, OA)<br>Data Analysis<br>Page 5             |
| 25. Description of the coding tree     | Did authors provide a description of the coding tree?                                                                           | Page 5 – under Data analysis.<br>See also online resource 2. |
| 26. Derivation of themes               | Were themes identified in advance or derived from the data?                                                                     | Page 5 – under Data analysis.<br>See also online resource 2. |
| 27. Software                           | What software, if applicable, was used to manage the data?                                                                      | Data Analysis.<br>Page 5.                                    |
| 28. Participant checking               | Did participants provide feedback on the findings?                                                                              | No.<br>Page 5 under<br><i>Interview procedures</i>           |
| <i>Reporting</i>                       |                                                                                                                                 |                                                              |
| 29. Quotations presented               | Were participant quotations presented to illustrate the themes/findings? Was each quotation identified? e.g. participant number | Results<br>Pages 6-14                                        |
| 30. Data and findings consistent       | Was there consistency between the data presented and the findings?                                                              | Yes.<br>Page 6-14                                            |
| 31. Clarity of major themes            | Were major themes clearly presented in the findings?                                                                            | Yes.<br>From page 6 to 14                                    |
| 32. Clarity of minor themes            | Is there a description of diverse cases or discussion of minor themes?                                                          | Discussion of major and minor themes<br>From pages 14-17     |
