# Supplementary material for: The experiences and needs of couples affected by prostate cancer aged 65 and under: a qualitative study
Source: Springer Nature journal article supplement (doi:10.1007/s11764-020-00936-1), 2020-09-24
Supplement: MOESM3 [file 18409262]

**Online Resource 3- Table 1: Demographic and diagnosis characteristics of interviewed couples**

The experiences and needs of couples affected by prostate cancer aged 65 and under; a qualitative study.

Journal of Cancer Survivorship

Nicole Collaço<sup>1,2\*</sup>, Richard Wagland<sup>1</sup>, Obrey Alexis<sup>2</sup>, Anna Gavin<sup>3</sup>, Adam Glaser<sup>4</sup>, Eila K Watson<sup>2</sup>

<sup>1</sup> Faculty of Health Sciences, University of Southampton, S017 1BJ

<sup>2</sup> Faculty of Health and Life Sciences, Oxford Brookes University, Jack Straws Lane, Oxford, OX3 0FL

<sup>3</sup> Northern Ireland Cancer Registry Centre for Public Health, School of Medicine, Dentistry and Biomedical Sciences, Queen's University, Belfast, BT12 6BA

<sup>4</sup> Leeds Institute of Cancer and Pathology, Faculty of Medicine and Health, University of Leeds, Worsley Building, Leeds, LS2 9NL

\*Correspondence to:

Nicole Collaço<sup>1</sup>

University of Southampton

Email: n.b.collaco@soton.ac.uk

**Table 1: Demographic and diagnosis characteristics of interviewed couples**

| Characteristic                                                      | Number (%)                              |
|---------------------------------------------------------------------|-----------------------------------------|
| <b>Ethnicity</b>                                                    |                                         |
| White British                                                       | 27 (96%)                                |
| Other                                                               | 1 (4%)                                  |
| <b>Ages</b>                                                         |                                         |
| <b>Men</b>                                                          | Mean- 54.7 years Range- (42-65) SD- 5.4 |
| 60-65                                                               | 4 (14%)                                 |
| 55-59                                                               | 10 (36%)                                |
| 50-54                                                               | 12 (43%)                                |
| ≤45                                                                 | 2 (7%)                                  |
| <b>Women</b>                                                        | Mean- 52.5 years Range- (33-67) SD- 8.8 |
| ≥65                                                                 | 3 (11%)                                 |
| 60-65                                                               | 3 (11%)                                 |
| 55-59                                                               | 6 (21%)                                 |
| 50-54                                                               | 10 (36%)                                |
| 45-49                                                               | 2 (7%)                                  |
| <45                                                                 | 4 (14%)                                 |
| <b>Length of Marriage/partnership</b>                               |                                         |
| ≤10                                                                 | 7 (25%)                                 |
| 11-20                                                               | 5 (18%)                                 |
| 21-30                                                               | 9 (32%)                                 |
| 31-40                                                               | 6 (21%)                                 |
| >40                                                                 | 1 (4%)                                  |
| <b>Couples with children in the following age categories (ages)</b> |                                         |
| Couples with no children                                            | 1 (4%)                                  |
| Couples with non-adult children (< 18 years)                        | 8 (28%)                                 |
| Couples with young adult children (≥ 18 years)                      | 12 (43%)                                |
| Couples who have both non-adult & young adult children              | 3 (11%)                                 |
| Couples with adult children (≥ 30 years)                            | 4 (14%)                                 |
| <b>Employment</b>                                                   |                                         |
| <b>Men</b>                                                          |                                         |
| Full time/Part time                                                 | 14 (50%)                                |
| Self-Employed                                                       | 7 (25%)                                 |

|                                                                                               |            |
|-----------------------------------------------------------------------------------------------|------------|
| Retired                                                                                       | 7 (25%)    |
| <b>Women</b>                                                                                  |            |
| Full time/Part time                                                                           | 21 (75%)   |
| Self-Employed                                                                                 | 1 (4%)     |
| Unemployed                                                                                    | 1 (4%)     |
| Retired                                                                                       | 5 (17%)    |
| <b>Mean Time Since Diagnosis (years)</b>                                                      | <b>3.2</b> |
| <b>Treatment</b>                                                                              |            |
| Surgery alone (RP)                                                                            | 6 (21%)    |
| Surgery & radiotherapy (EBR)                                                                  | 3 (11%)    |
| Surgery, radiotherapy & hormone therapy (HT)                                                  | 3 (11%)    |
| Radiotherapy & hormone therapy                                                                | 4 (14%)    |
| Active surveillance (AS)                                                                      | 7 (25%)    |
| Hormone therapy & adjuvant therapy<br>(chemotherapy, radium 223,<br>Enzalutamide/Abiraterone) | 4 (14%)    |
| Other treatment (OT)                                                                          | 1 (4%)     |
| STAMPEDE Trial (ST) <sup>1</sup>                                                              | 3 (11%)    |
| <b>Stage of PCa</b>                                                                           |            |
| Stage 1                                                                                       | 7 (25%)    |
| Stage 2                                                                                       | 7 (25%)    |
| Stage 3                                                                                       | 8 (29%)    |
| Stage 4                                                                                       | 5 (18%)    |
| Not known                                                                                     | 1 (3%)     |
| <b>Healthcare</b>                                                                             |            |
| Private                                                                                       | 6 (21%)    |
| NHS                                                                                           | 22 (79%)   |
|                                                                                               |            |
| <b>Family history of PCa</b>                                                                  | 10 (36%)   |

---

<sup>1</sup> STAMPEDE (Systemic Therapy in Advancing or Metastatic Prostate Cancer: Evaluation of Drug Efficacy- A large trial that aimed to assess new treatment approaches for locally advanced or metastatic PCa.
