# Supplementary material for: The experiences and needs of couples affected by prostate cancer aged 65 and under: a qualitative study
Source: Springer Nature journal article supplement (doi:10.1007/s11764-020-00936-1), 2020-09-24

## Online Resource 4- Figure 1- Conceptualisation of Findings

The experiences and needs of couples affected by prostate cancer aged 65 and under; a qualitative study.

Journal of Cancer Survivorship

Nicole Collaço<sup>1,2\*</sup>, Richard Wagland<sup>1</sup>, Obrey Alexis<sup>2</sup>, Anna Gavin<sup>3</sup>, Adam Glaser<sup>4</sup>, Eila K Watson<sup>2</sup>

<sup>1</sup> Faculty of Health Sciences, University of Southampton, S017 1BJ

<sup>2</sup> Faculty of Health and Life Sciences, Oxford Brookes University, Jack Straws Lane, Oxford, OX3 0FL

<sup>3</sup> Northern Ireland Cancer Registry Centre for Public Health, School of Medicine, Dentistry and Biomedical Sciences, Queen's University, Belfast, BT12 6BA

<sup>4</sup> Leeds Institute of Cancer and Pathology, Faculty of Medicine and Health, University of Leeds, Worsley Building, Leeds, LS2 9NL

\*Correspondence to:

Nicole Collaço<sup>1</sup>

University of Southampton

Email: n.b.collaco@soton.ac.uk

**Figure 1- Conceptualisation of Findings**

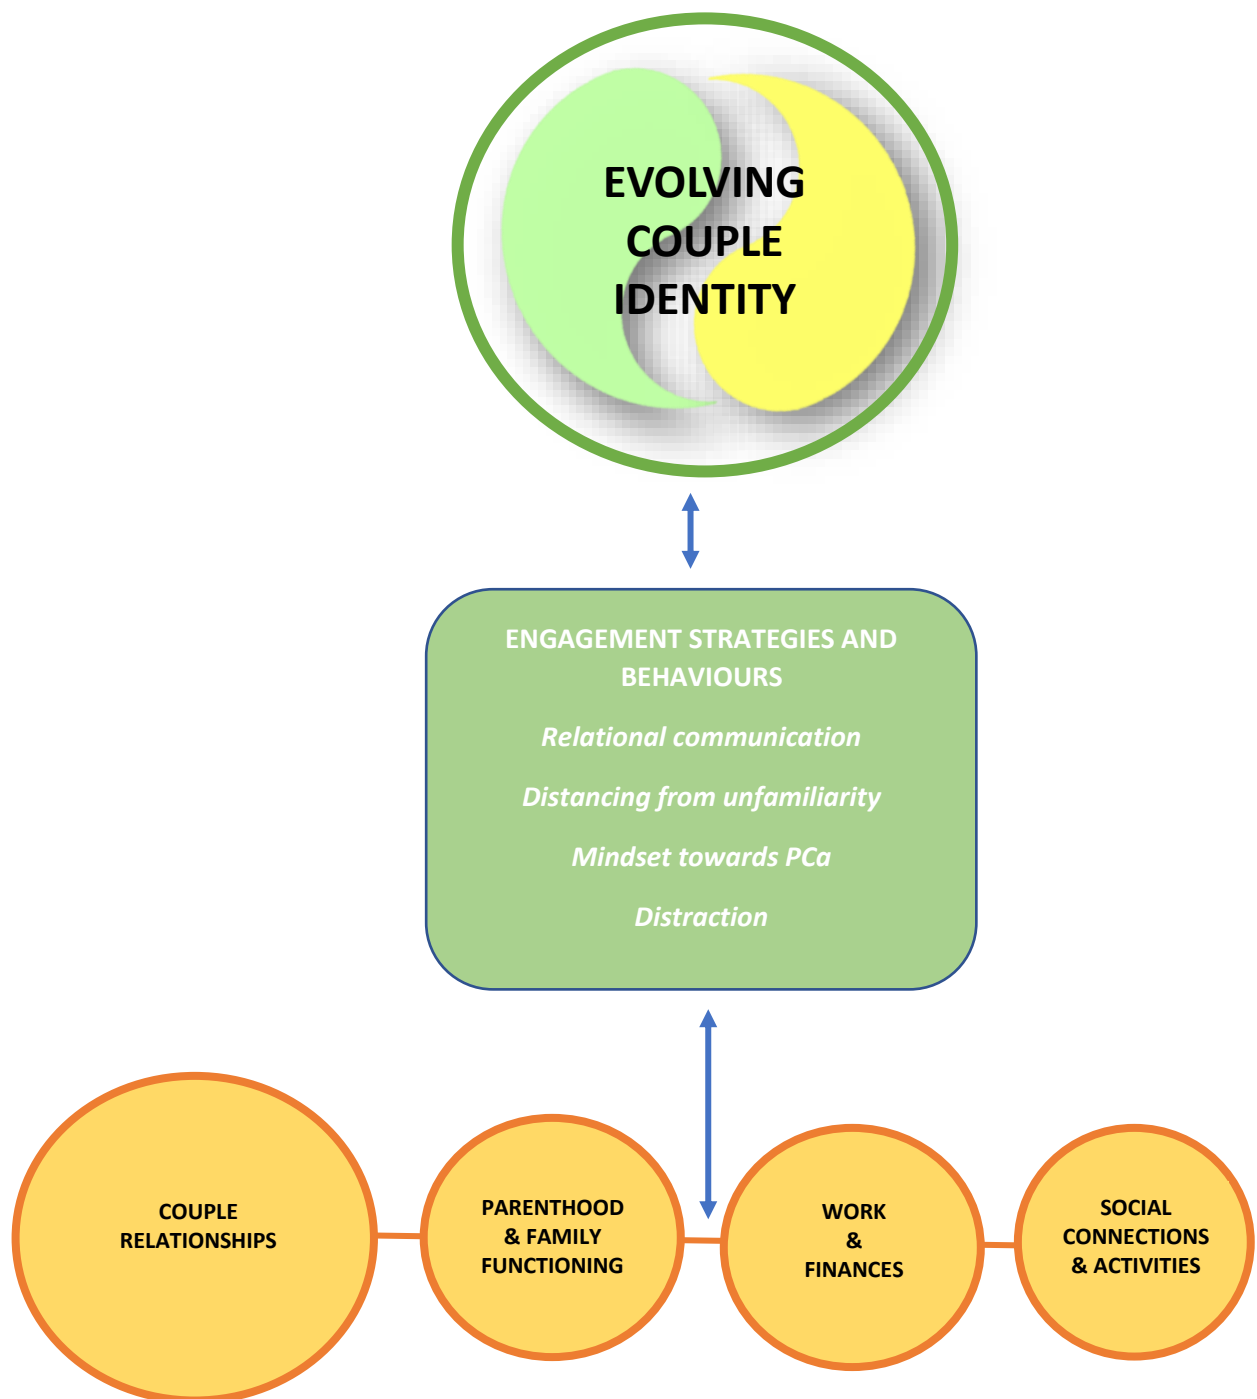

Supplement: MOESM4 [file 18409262]
